# Supplementary material
Source: PubMed Central journal article supplement (PMC2966871)
Supplement: NIHMS216352-supplement-01.pdf [file NIHMS216352-supplement-01.pdf]

Supplementary Table 1:

BR regulated proteins and their expression in response to BL treatment and in the *bri1-116* mutant and *bzr1-1D* transgenic plants (mBZR1-CFP).

Protein or RNA expression data are averages of three biological repeats. RNA data are from previous microarray studies (He et al., 2005).

| Spot Number | Gene Locus | Protein Name                                       | RNA level       |                    | Protein Level<br>6hr (BL/Mock) |         | Protein Level<br>12 hr(BL/Mock) |         |
|-------------|------------|----------------------------------------------------|-----------------|--------------------|--------------------------------|---------|---------------------------------|---------|
|             |            |                                                    | <i>det2</i> /WT | <i>bzr1-1D</i> /WT | ratio                          | p value | ratio                           | p value |
| 311         | At1g22530  | Sec14 cytosolic factor (PATL2)                     | 0.91            | 1.11               | 2.16                           | 3.0E-02 | 1.72                            | 1.4E-02 |
| 317         | At1g22530  | Sec14 cytosolic factor (PATL2)                     | 0.91            | 1.11               | 2.13                           | 2.1E-03 | 2.07                            | 6.3E-04 |
| 321         | At1g22530  | Sec14 cytosolic factor (PATL2)                     | 0.91            | 1.11               | 1.88                           | 3.9E-02 | 2.04                            | 1.5E-03 |
| 742         | At1g72150  | Sec14 cytosolic factor (PATL1)                     | 0.73            | 0.98               | 1.45                           | 6.0E-03 | 1.81                            | 6.5E-02 |
| 745         | At1g72150  | Sec14 cytosolic factor (PATL1)                     | 0.73            | 0.98               | 1.97                           | 1.8E-02 | 2.19                            | 2.0E-04 |
| 801         | At1g30690  | Sec14 cytosolic factor (PATL4)                     | 1.02            | 1.59               | 1.19                           | 4.0E-01 | 1.21                            | 2.3E-01 |
| 819         | At4g24190  | SHEPHERD (GRP94)                                   | 1.21            | 1.26               | 1.14                           | 3.4E-01 | 1.19                            | 4.8E-02 |
| 953         | At3g46970  | alpha-glucan phosphorylase                         | 1.19            | 1.46               | 1.12                           | 1.1E-01 | 1.13                            | 8.3E-03 |
| 1122        | At5g42020  | luminal binding protein 2 (BiP-2)                  | 1.24            | 1.23               | 1.16                           | 4.9E-02 | 1.24                            | 1.1E-02 |
| 1150        | At5g02490  | heat shock cognate (HSC70-2)                       | 0.64            | 1.08               | -1.02                          | 7.0E-01 | 1.10                            | 4.3E-03 |
| 1214        | At3g12580  | heat shock protein 70                              | 0.39            | 1.43               | 1.12                           | 7.7E-02 | 1.29                            | 4.8E-02 |
| 1433        | At5g11670  | malate oxidoreductase                              | 0.55            | 0.95               | 1.03                           | 1.2E-01 | 1.05                            | 1.9E-01 |
| 1734        | At5g44340  | tubulin beta-4 chain (TUB4)                        | 1.02            | 1.05               | 1.14                           | 2.9E-01 | 1.05                            | 1.7E-02 |
| 1769        | At3g23810  | S-adenosyl-L-homocysteine hydrolase                | 0.96            | 1.10               | 1.11                           | 1.6E-01 | 1.21                            | 4.9E-02 |
| 1792        | At4g14960  | tubulin alpha-6 chain (TUA6)                       | 1.12            | 1.22               | 1.16                           | 5.5E-02 | 1.14                            | 1.2E-01 |
| 1937        | At1g57720  | elongation factor 1B-gamma                         | 1.10            | 1.05               | -1.01                          | 7.8E-01 | -1.02                           | 6.5E-01 |
| 1941        | At3g09940  | monodehydroascorbate reductase (AtMDAR3)           | 1.10            | 0.59               | 1.03                           | 2.6E-01 | 1.02                            | 3.7E-01 |
| 2057        | At3g17390  | S-adenosylmethionine synthetase                    | 1.06            | 1.08               | 1.13                           | 1.1E-03 | 1.17                            | 1.6E-01 |
| 2062        | At1g08200  | similar to dihydroflavonol reductase AXS2          | 1.10            | 1.12               | 1.15                           | 5.8E-02 | 1.21                            | 1.8E-04 |
| 2075        | At3g18780  | actin2 (ACT2)                                      | 1.21            | 1.09               | 1.08                           | 8.3E-03 | 1.13                            | 1.1E-02 |
| 2088        | At4g23600  | coronatine-responsive tyrosine aminotransferase    | 8.88            | 2.51               | 1.04                           | 4.6E-01 | 1.09                            | 1.4E-01 |
| 2168        | At1g76680  | 2-oxophytodienoate reductase (OPR1)                | 0.40            | 1.17               | -1.03                          | 5.8E-01 | 1.35                            | 6.3E-02 |
| 2239        | At5g37600  | glutamine synthetase                               | 0.34            | 0.43               | 1.09                           | 3.8E-02 | 1.29                            | 3.1E-02 |
| 2294        | At1g76180  | dehydrin ERD14                                     | 0.75            | 0.89               | -1.13                          | 9.0E-02 | 1.09                            | 1.4E-01 |
| 2295        | At1g62380  | ACC oxidase (ACO2)                                 | 0.89            | 1.05               | -1.02                          | 9.0E-02 | -1.25                           | 8.6E-04 |
| 2296        | At1g62380  | ACC oxidase (ACO2)                                 | 0.89            | 1.05               | -1.04                          | 1.1E-02 | -1.13                           | 3.5E-04 |
| 2353        | At2g47470  | thioredoxin family protein                         | 1.14            | 1.10               | 1.09                           | 2.6E-01 | 1.18                            | 2.9E-01 |
| 2362        | At3g44860  | S-adenosyl-L-methionine:carboxyl methyltransferase | 1.06            | 0.78               | 1.07                           | 7.2E-01 | 1.02                            | 8.5E-01 |
| 2497        | At1g54040  | kelch repeat-containing protein                    | 173.52          | 0.62               | -1.02                          | 3.5E-01 | 1.70                            | 1.1E-02 |
| 2506        | At1g54040  | kelch repeat-containing protein                    | 173.52          | 0.62               | 1.01                           | 9.6E-01 | 1.03                            | 9.1E-01 |
| 2635        | At4g12720  | MutT/nudix family protein                          | 0.78            | 1.09               | 1.41                           | 1.7E-02 | 1.86                            | 1.9E-03 |

| Spot<br>Number | Gene Locus | Protein Name                                 | RNA level       |                    | Protein Level<br>6hr (BL/Mock) |         | Protein Level<br>12 hr(BL/Mock) |         |
|----------------|------------|----------------------------------------------|-----------------|--------------------|--------------------------------|---------|---------------------------------|---------|
|                |            |                                              | <i>det2</i> /WT | <i>bzr1-1D</i> /WT | ratio                          | p value | ratio                           | p value |
| 2770           | At2g41100  | calmodulin-related protein 3 (TCH3)          | 0.74            | 0.96               | 1.00                           | 1.0E+00 | 1.05                            | 5.0E-02 |
| 2866           | At3g53460  | 29 kDa ribonucleoprotein, chloroplast (CP29) | 1.38            | 1.18               | 1.02                           | 8.4E-01 | 1.03                            | 6.1E-01 |
| 2880           | At3g53460  | 29 kDa ribonucleoprotein, chloroplast (CP29) | 1.38            | 1.18               | -1.01                          | 8.1E-01 | 1.05                            | 4.0E-02 |
| 2898           | At5g54770  | thiazole biosynthetic enzyme (THI1)          | 1.30            | 1.26               | 1.01                           | 9.2E-01 | -1.25                           | 6.2E-02 |
| 2957           | At5g54770  | thiazole biosynthetic enzyme (THI1)          | 1.30            | 1.26               | 1.02                           | 7.3E-01 | -1.44                           | 1.4E-02 |
| 3034           | At1g10370  | glutathione S-transferase                    | 1.07            | 2.72               | 1.07                           | 4.4E-01 | -1.42                           | 1.4E-02 |
| 3093           | At4g30530  | defense-related protein                      | 0.82            | 0.89               | 1.10                           | 2.3E-01 | 1.18                            | 1.8E-02 |
| 3108           | At5g10450  | 14-3-3 protein GF14 lambda (GRF6)            | 1.15            | 0.98               | 1.06                           | 1.4E-01 | 1.09                            | 1.0E-02 |
| 3115           | At5g65430  | 14-3-3 protein GF14 kappa (GRF8)             | 1.03            | 1.08               | 1.05                           | 5.6E-03 | 1.11                            | 1.2E-01 |
| 3129           | At5g20630  | germin-like protein subfamily 3 member 3     | 1.57            | 1.57               | 1.08                           | 3.0E-02 | 1.22                            | 2.4E-02 |
| 3177           | At1g50670  | OTU-like cysteine protease family protein    | 1.18            | 1.08               | 1.66                           | 8.0E-02 | 1.47                            | 2.8E-01 |
| 3279           | At4g02520  | glutathione S-transferase (ATGSTF2)          | 0.95            | 0.97               | -1.10                          | 2.2E-01 | -1.03                           | 7.9E-01 |
| 3286           | At2g30860  | glutathione S-transferase (ATGSTF9)          | 0.98            | 0.98               | -1.05                          | 3.2E-01 | 1.04                            | 6.3E-01 |
| 3291           | At4g02520  | glutathione S-transferase (ATGSTF2)          | 0.95            | 0.97               | -1.05                          | 5.4E-01 | -1.05                           | 5.3E-01 |
| 3299           | At2g41090  | calmodulin-like protein (CABP-22)            | 0.56            | 1.14               | 1.01                           | 7.2E-01 | 1.78                            | 2.7E-02 |
| 3308           | At1g02920  | glutathione S-transferase (ATGSTF7 )         | 0.75            | 0.96               | -1.04                          | 5.1E-01 | -1.01                           | 8.8E-01 |
| 3344           | At2g47730  | glutathione S-transferase 6 (GST6)           | 0.85            | 1.11               | -1.02                          | 7.4E-01 | 1.15                            | 3.1E-01 |
| 3603           | At3g25770  | allene oxide cyclase (AOC2)                  | 1.47            | 1.71               | 1.04                           | 7.3E-01 | 1.15                            | 1.2E-03 |
| 4536           | AT1G02930  | glutathione S-transferase 1 (GST1)           | 0.75            | 0.96               | -1.07                          | 3.7E-01 | 1.30                            | 2.9E-02 |

Notes: WT (wild type), NA (not available)

| Spot Number | Protein Level<br>24 hr(BL/Mock) |         | Protein level<br><i>bri1-116</i> /WT |         | Protein level<br>mBZR1-CFP/WT |         | Protein level<br><i>det2</i> /WT |         |
|-------------|---------------------------------|---------|--------------------------------------|---------|-------------------------------|---------|----------------------------------|---------|
|             | ratio                           | p value | ratio                                | p value | ratio                         | p value | ratio                            | p value |
| 311         | 2.69                            | 1.5E-02 | -2.20                                | 4.2E-04 | 1.43                          | 2.3E-02 | -1.58                            | 2.3E-02 |
| 317         | 2.78                            | 6.6E-03 | -2.59                                | 8.5E-06 | 1.49                          | 5.1E-05 | -1.39                            | 1.0E-01 |
| 321         | 2.87                            | 8.8E-03 | -2.62                                | 2.2E-04 | 1.36                          | 6.5E-04 | -1.32                            | 1.1E-01 |
| 742         | 3.22                            | 8.2E-06 | -1.75                                | 2.1E-02 | 1.49                          | 4.9E-03 | -2.25                            | 6.7E-02 |
| 745         | 3.51                            | 3.0E-05 | -2.03                                | 2.0E-03 | 1.51                          | 2.0E-03 | -1.82                            | 6.5E-02 |
| 801         | 1.86                            | 5.0E-03 | -2.33                                | 2.0E-04 | 1.05                          | 5.2E-01 | -1.23                            | NA      |
| 819         | 1.36                            | 2.1E-03 |                                      | NA      | 1.12                          | 3.9E-02 | -2.17                            | 4.9E-02 |
| 953         | 1.34                            | 4.3E-05 | -1.29                                | 1.4E-05 | 1.12                          | 3.9E-02 | -1.04                            | 4.9E-01 |
| 1122        | 1.58                            | 3.0E-03 | -1.19                                | 3.7E-03 | 1.40                          | 5.8E-03 | 1.87                             | 8.2E-03 |
| 1150        | 1.69                            | 1.0E-02 | 1.09                                 | 1.3E-01 | -1.07                         | 5.8E-01 |                                  | NA      |
| 1214        | 1.47                            | 9.9E-03 | -1.13                                | 5.8E-03 | -1.15                         | 1.5E-01 | 1.01                             | 9.6E-01 |
| 1433        | 1.65                            | 2.6E-03 | -1.46                                | 3.5E-05 | -1.32                         | 5.0E-02 | -1.54                            | 4.0E-02 |
| 1734        | 1.42                            | 2.5E-02 | -1.17                                | 1.2E-04 | 1.09                          | 3.9E-02 | -1.08                            | 4.1E-01 |
| 1769        | 1.63                            | 2.6E-04 |                                      | NA      | -1.10                         | 3.3E-02 | -1.18                            | 2.2E-02 |
| 1792        | 1.39                            | 8.5E-03 |                                      | NA      | 1.07                          | 8.9E-02 | -1.21                            | 4.6E-02 |
| 1937        | 3.10                            | 2.4E-02 |                                      | NA      | 1.20                          | 8.9E-02 | 1.13                             | NA      |
| 1941        | 1.59                            | 4.0E-03 |                                      | NA      | -1.44                         | 1.9E-02 | -1.15                            | 2.2E-01 |
| 2057        | 1.46                            | 5.4E-05 | -1.04                                | 3.4E-01 | 1.11                          | 2.2E-02 | 1.1                              | 2.4E-01 |
| 2062        | 1.39                            | 1.6E-03 | -1.12                                | 1.6E-01 | 1.03                          | 4.0E-01 | 1.11                             | 2.7E-01 |
| 2075        | 1.34                            | 1.3E-02 | 1.09                                 | 6.1E-03 | 1.11                          | 1.0E-01 | -1.09                            | 3.2E-02 |
| 2088        | 1.46                            | 3.0E-05 | 1.04                                 | 3.6E-03 | 1.07                          | 5.3E-03 | 5.07                             | 3.0E-03 |
| 2168        | 1.52                            | 4.6E-03 | -1.00                                | 9.6E-01 | 1.07                          | 5.0E-01 | -1.03                            | NA      |
| 2239        | 1.89                            | 3.1E-04 | -1.04                                | 6.5E-02 | -1.28                         | 2.6E-02 | -1.24                            | 9.5E-03 |
| 2294        | -1.34                           | 2.2E-03 | 1.03                                 | 2.7E-01 | 1.06                          | 3.6E-01 | -1.1                             | 2.5E-01 |
| 2295        | -1.55                           | 6.3E-04 | 1.01                                 | 8.9E-01 | -1.21                         | 7.6E-03 | -1.12                            | 3.0E-01 |
| 2296        | -1.32                           | 3.0E-02 | -1.05                                | 5.3E-01 | -1.08                         | 2.1E-06 | -1.25                            | 6.3E-03 |
| 2353        | 1.30                            | 3.2E-02 | -1.07                                | 5.1E-01 | 1.05                          | 4.4E-01 | 1.12                             | 1.4E-01 |
| 2362        | 1.59                            | 9.3E-03 | -1.00                                | 9.8E-01 | 1.12                          | 2.7E-01 | 1.12                             | 1.8E-01 |
| 2497        | 1.53                            | 1.3E-02 | 1.15                                 | 2.5E-04 | -1.14                         | 1.4E-01 | 3.29                             | 2.4E-01 |
| 2506        | 1.87                            | 2.1E-06 | -1.18                                | 3.1E-01 | 1.07                          | 5.2E-01 | 14.01                            | 6.4E-02 |
| 2635        | 2.89                            | 3.2E-02 | 1.23                                 | 2.6E-02 | -1.05                         | 3.1E-01 | 1.19                             | 7.6E-01 |

| Spot<br>Number | Protein Level<br>24 hr(BL/Mock) |         | Protein level<br><i>bri1-116</i> /WT |         | Protein level<br>mBZR1-CFP/WT |         | Protein level<br><i>det2</i> /WT |         |
|----------------|---------------------------------|---------|--------------------------------------|---------|-------------------------------|---------|----------------------------------|---------|
|                | ratio                           | p value | ratio                                | p value | ratio                         | p value | ratio                            | p value |
| 2770           | 1.59                            | 7.7E-03 | -1.09                                | 5.1E-01 | -1.14                         | 2.7E-01 | -1.12                            | 2.4E-01 |
| 2866           | -1.24                           | 6.1E-04 | 1.05                                 | 1.5E-01 | -1.04                         | 4.7E-01 | 1.15                             | 1.5E-03 |
| 2880           | -1.34                           | 8.3E-03 | 1.09                                 | 3.4E-01 | 1.23                          | 5.1E-02 | 1.39                             | 3.2E-03 |
| 2898           | -3.16                           | 1.9E-03 | -1.48                                | 1.7E-02 | 1.25                          | 4.1E-02 | 2.2                              | 4.7E-02 |
| 2957           | -3.37                           | 2.0E-02 | -1.54                                | 3.3E-04 | 1.32                          | 9.3E-03 | 1.59                             | 9.1E-02 |
| 3034           | 1.67                            | 6.4E-06 | 1.10                                 | 2.8E-01 | 1.31                          | 4.4E-03 | -1.18                            | 3.1E-01 |
| 3093           | 1.59                            | 1.2E-05 | -1.21                                | 2.9E-02 | -1.11                         | 1.4E-01 | -1.05                            | 5.3E-01 |
| 3108           | 1.27                            | 6.6E-04 |                                      | NA      | -1.03                         | 4.2E-02 | -1.29                            | 5.1E-02 |
| 3115           | 1.38                            | 3.1E-05 | 1.04                                 | 4.2E-01 | 1.04                          | 3.4E-01 | -1.24                            | 2.2E-02 |
| 3129           | 1.48                            | 1.4E-02 | 1.04                                 | 5.5E-01 | 1.09                          | 1.9E-01 | -1.07                            | 3.5E-01 |
| 3177           | 2.22                            | 2.0E-03 | 1.09                                 | 8.0E-02 | 1.13                          | 4.2E-01 | -1.09                            | 4.5E-01 |
| 3279           | 1.70                            | 4.0E-04 | -1.05                                | 6.0E-01 | -1.82                         | 9.2E-03 | 1.71                             | 5.5E-01 |
| 3286           | 1.34                            | 5.7E-05 | 1.05                                 | 5.6E-01 | -1.28                         | 2.3E-03 | 1.16                             | 5.2E-01 |
| 3291           | 1.33                            | 4.8E-03 | -1.15                                | 3.0E-01 | -1.54                         | 1.4E-02 | 1.15                             | 5.8E-01 |
| 3299           | 5.33                            | 5.6E-04 | 1.01                                 | 6.9E-01 | -1.33                         | 2.3E-02 | -1.37                            | 3.9E-02 |
| 3308           | 1.43                            | 2.0E-04 | 1.03                                 | 2.3E-01 | -1.23                         | 9.7E-02 | 1.09                             | 8.0E-01 |
| 3344           | 1.52                            | 2.9E-03 | -1.17                                | 1.6E-01 | 1.16                          | 9.8E-02 | 1.12                             | 4.8E-01 |
| 3603           | 1.67                            | 1.6E-03 | 1.04                                 | 6.2E-01 | -1.05                         | 6.9E-01 | -1.34                            | 1.7E-01 |
| 4536           | 1.88                            | 9.5E-04 | -1.15                                | 3.2E-01 | 1.07                          | 4.5E-01 | 1.3                              | 4.5E-01 |
