# Supplementary material
Source: PubMed Central journal article supplement (PMC2966871)

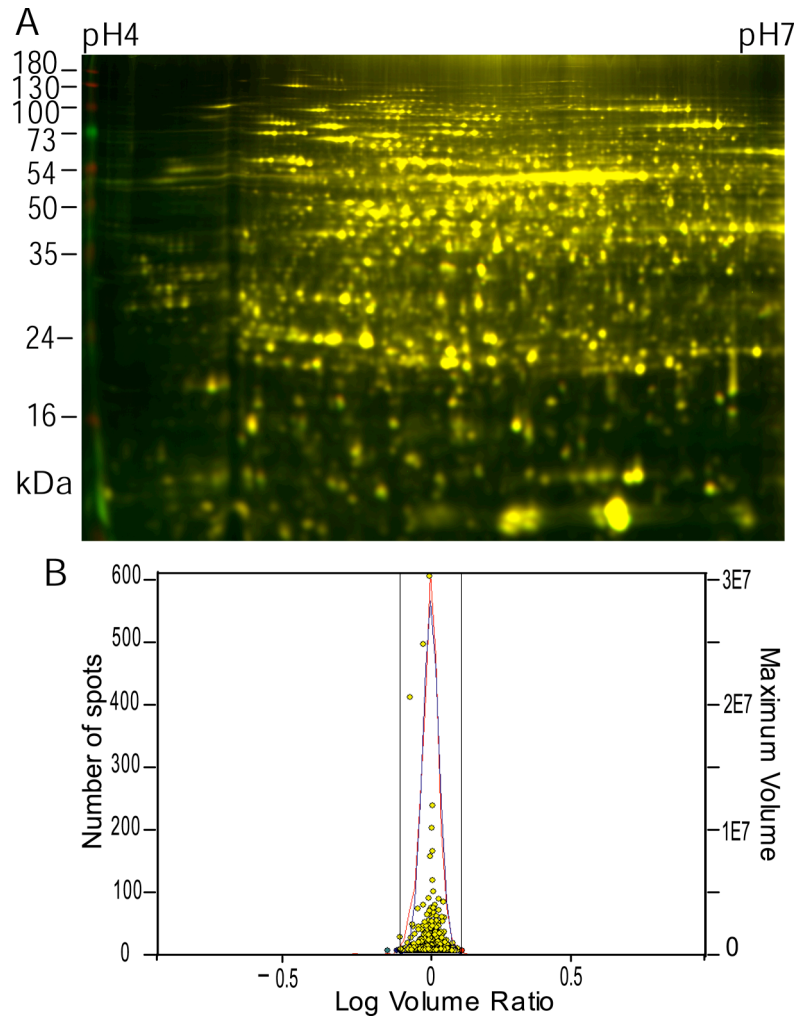

Supplementary Fig. 1

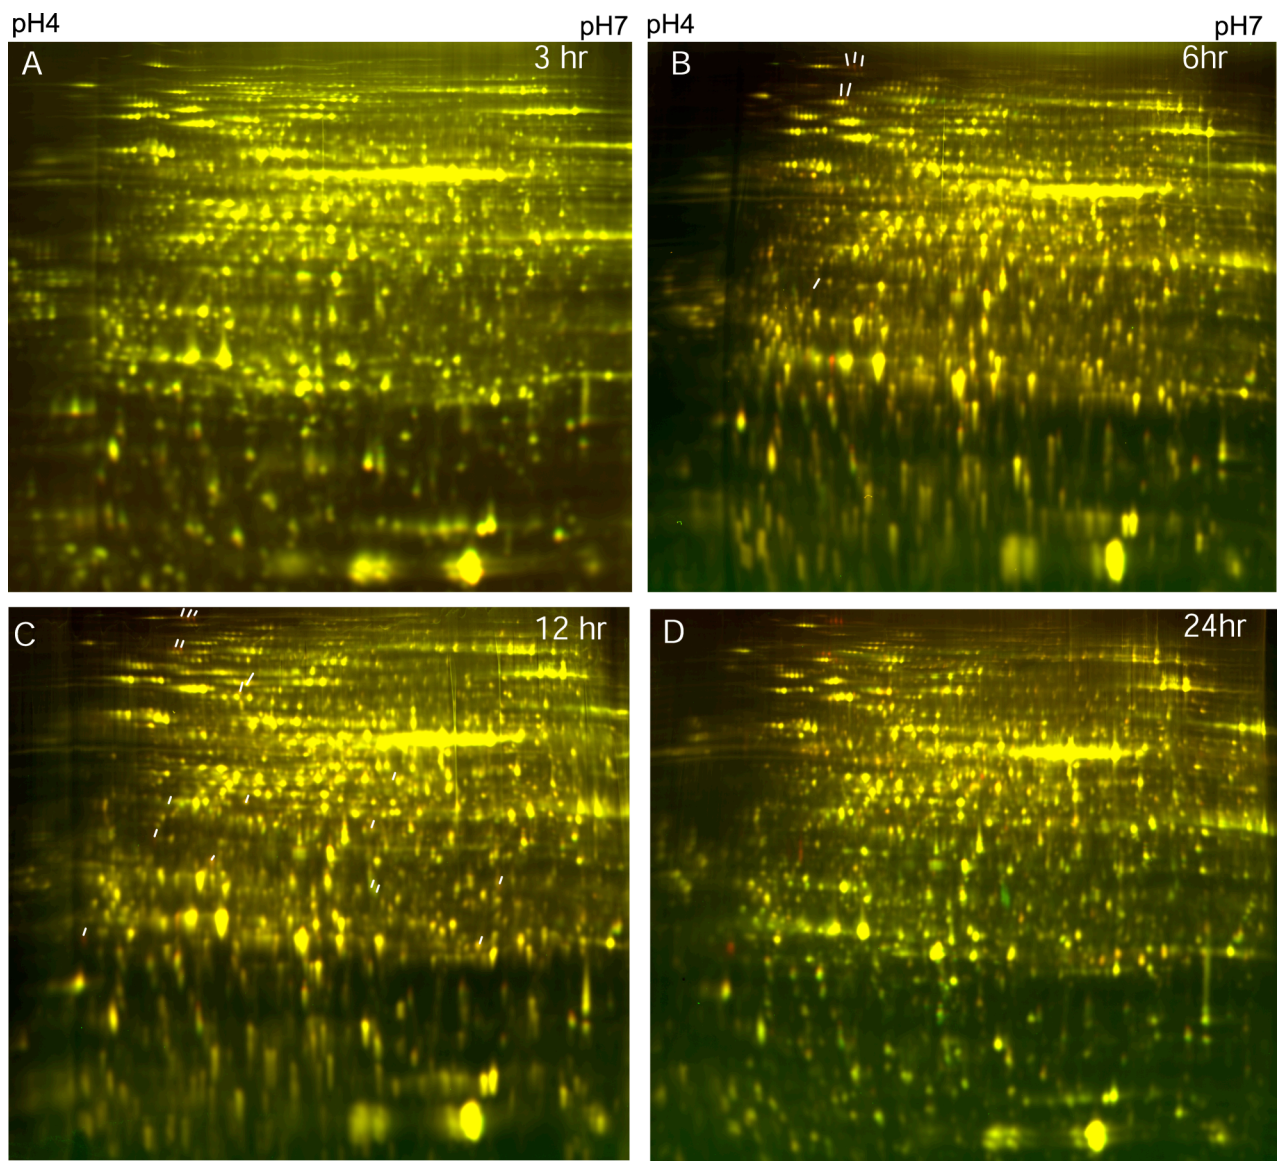

Supplementary Fig. 2

Supplement: NIHMS216352-supplement-Supplemental_Figures.pdf [file NIHMS216352-supplement-Supplemental_Figures.pdf]
